# Supplementary material for: A laboratory investigation of the effectiveness of various skin and surface decontaminants for aliphatic polyisocyanates
Source: Royal Society of Chemistry journal article supplement (doi:10.1039/b503807c), 2005-01-01

**Figure S1. Surface decontamination efficiency for the HDI polyisocyanate isocyanurate (N3300) by various painters' hand cleaners. % Unreacted Remaining is the mean (n=3) isocyanate fraction remaining on the surface after wiping and recovered as NCO-MAP; % Unreacted Removed is the mean (n=3) isocyanate fraction physically removed during wiping and recovered as NCO-MAP; % Reacted is a calculation of the isocyanate fraction consumed by chemical reactions during the first minute of wiping. This fraction could not be measured directly. The difference to 100% is other losses. ZEP-PHC is the ZEP<sup>®</sup> painters partner<sup>™</sup> hand cleaner (Zep Manufacturing Co., Atlanta, GA); STOKO-CUPRAN PHC is the STOKO<sup>®</sup> Cupran<sup>®</sup> special hand cleaner (Stockhausen Inc., Greensboro, NC); CLI-DTAM is an isocyanate skin decontaminant from Colormetric Laboratories (Des Plaines, IL); GOJO-PHC is the GOJO<sup>®</sup> painter's hand cleaner (Gojo Industries, Inc., Akron, OH); STOKO-ARTL SPC is the STOKO<sup>®</sup> Arretil<sup>®</sup> skin protection cream (Stockhausen Inc., Greensboro, NC).**

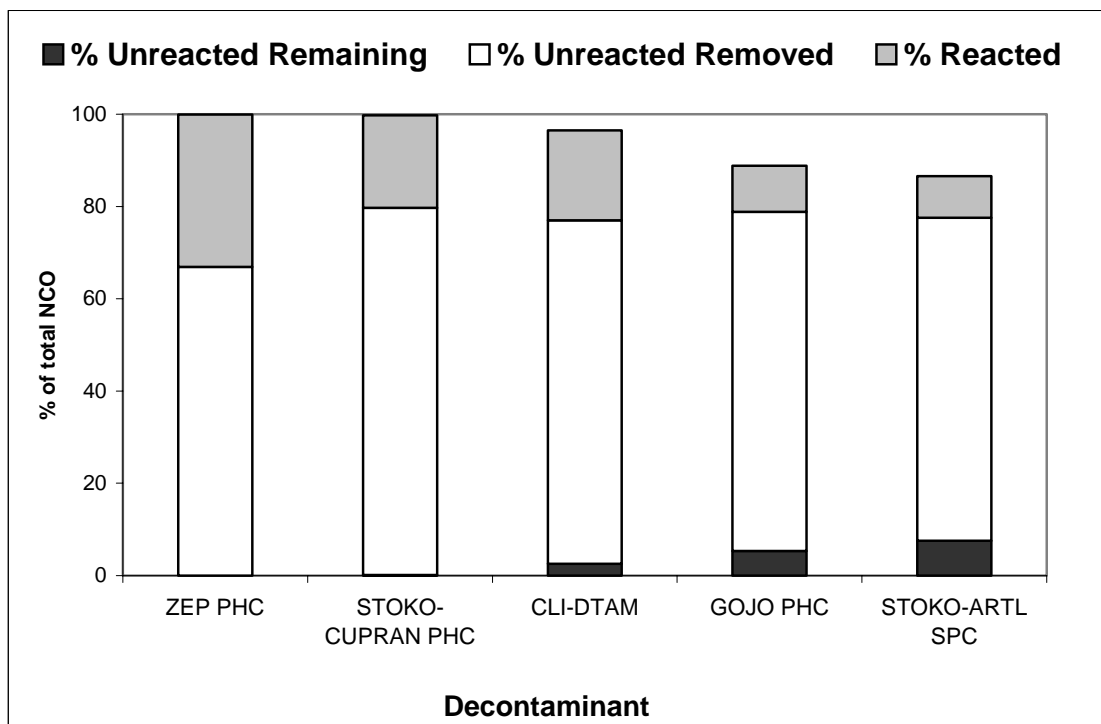

Supplement: b503807c.pdf [file b503807c.pdf]
